# Supplementary material for: Homogeneous Insulin and C-Peptide Sensors for Rapid Assessment of Insulin and C-Peptide Secretion by the Islets
Source: PubMed Central journal article supplement — Diabetes. 2010 Jul 9;59(10):2360–5. doi: 10.2337/db10-0088 (PMC3279555; doi:10.2337/db10-0088), 2010-07-09
Supplement: supp_db10-0088_db100088onlineappendix.pdf [file supp_db10-0088_db100088onlineappendix.pdf]

### Insulin and C-peptide FRET sensor assay characteristics.

Tables S1 – S10 summarize experiments that were performed to determine basic characteristics of FRET sensor assays. Insulin and C-peptide determinations for these experiments were performed as Described in Research Design and Methods section. Between assays variation (Tables S1 and S2) was determined by measuring three samples from human islet secretion experiments five times. Each measurement was done in duplicate with independently prepared FRET sensor and calibration curve. Within assay variation (Tables S3 and S4) was determined by measuring three samples from human islet secretion experiments five times. Each measurement was done in duplicate using the same sensor mix and calibration curve. Spike and recovery (Tables S5 and S6) was assessed by adding various known amounts of insulin (or C-peptide) to five (four in the case of C-peptide) samples from human islet secretion experiments and comparing experimentally measured insulin (or C-peptide) concentrations with calculated expected concentrations. Assay linearity (Tables S7 and S8) was determined by measuring insulin (or C-peptide) in three samples from human islet secretion experiments. These samples were then serially diluted (2, 4 and 8 fold) and experimentally determined insulin (or C-peptide) concentration was compared with the expected concentration calculated from the dilution. Assay crossreactivity (Tables S9 and S10) was assessed by comparing FRET signal obtained with 10 nM human insulin (or C-peptide) with signals observed at 10 nM, 100 nM and 1000 nM of the analyte tested for crossreactivity.

**Table S1.** Between assay precision: insulin sensor.

| Sample number | Mean (nM) | % CV |
|---------------|-----------|------|
| 1             | 0.94      | 9.8  |
| 2             | 1.43      | 7.6  |
| 3             | 2.1       | 7.6  |

**Table S2.** Between assay precision: C-peptide sensor.

| Sample number | Mean (nM) | % CV |
|---------------|-----------|------|
| 1             | 3.70      | 8.8  |
| 2             | 7.43      | 7.0  |
| 3             | 14.67     | 4.9  |

**Table S3.** Within assay precision: insulin sensor.

| Sample number | Mean (nM) | % CV |
|---------------|-----------|------|
| 1             | 1.46      | 3.4  |
| 2             | 2.68      | 4.3  |
| 3             | 5.68      | 3.4  |

**Table S4.** Within assay precision: C-peptide sensor.

| Sample number | Mean (nM) | % CV |
|---------------|-----------|------|
| 1             | 0.99      | 5.0  |
| 2             | 2.09      | 4.8  |
| 3             | 4.48      | 3.5  |

**Table S5.** Spike and recovery: insulin sensor

| <b>Sample number</b> | <b>Observed concentration (nM)</b> | <b>Expected concentration (nM)</b> | <b>% of recovery</b> |
|----------------------|------------------------------------|------------------------------------|----------------------|
| 1                    | 2.71                               | 2.32                               | 117                  |
|                      | 4.89                               | 4.32                               | 113                  |
|                      | 9.01                               | 8.32                               | 109                  |
| 2                    | 2.43                               | 2.01                               | 121                  |
|                      | 4.57                               | 4.01                               | 114                  |
|                      | 8.45                               | 8.01                               | 105                  |
| 3                    | 2.51                               | 2.29                               | 110                  |
|                      | 4.58                               | 4.29                               | 107                  |
|                      | 8.38                               | 8.29                               | 101                  |
| 4                    | 2.53                               | 2.01                               | 126                  |
|                      | 4.78                               | 4.01                               | 119                  |
|                      | 8.59                               | 9.01                               | 107                  |
| 5                    | 2.88                               | 2.78                               | 104                  |
|                      | 5.04                               | 4.78                               | 105                  |
|                      | 9.19                               | 8.78                               | 105                  |

**Table S6.** Spike and recovery: C-peptide sensor

| <b>Sample number</b> | <b>Observed concentration (nM)</b> | <b>Expected concentration (nM)</b> | <b>% of recovery</b> |
|----------------------|------------------------------------|------------------------------------|----------------------|
| 1                    | 2.44                               | 2.35                               | 104                  |
|                      | 3.68                               | 3.85                               | 96                   |
|                      | 6.52                               | 6.84                               | 95                   |
| 2                    | 2.71                               | 2.44                               | 111                  |
|                      | 4.02                               | 3.94                               | 102                  |
|                      | 7.88                               | 6.94                               | 113                  |
| 3                    | 1.16                               | 1.27                               | 92                   |
|                      | 2.85                               | 2.77                               | 103                  |
|                      | 6.50                               | 5.77                               | 113                  |
| 4                    | 1.17                               | 1.24                               | 95                   |
|                      | 2.72                               | 2.74                               | 99                   |
|                      | 7.14                               | 5.74                               | 124                  |

**Table S7.** Assay linearity: insulin sensor

| <b>Sample number</b> | <b>Sample dilution (fold)</b> | <b>Expected concentration (nM)</b> | <b>Observed concentration (nM)</b> | <b>% of recovery</b> |
|----------------------|-------------------------------|------------------------------------|------------------------------------|----------------------|
| 1                    | 0                             | 2.64                               | 2.64                               | 100                  |
|                      | 2                             | 1.32                               | 1.38                               | 104                  |
|                      | 4                             | 0.66                               | 0.62                               | 94                   |
|                      | 8                             | 0.33                               | 0.28                               | 85                   |
| 2                    | 0                             | 5.38                               | 5.38                               | 100                  |
|                      | 2                             | 2.69                               | 3.09                               | 115                  |
|                      | 4                             | 1.34                               | 1.39                               | 104                  |
|                      | 8                             | 0.67                               | 0.65                               | 97                   |
| 3                    | 0                             | 10.88                              | 10.88                              | 100                  |
|                      | 2                             | 5.44                               | 5.60                               | 103                  |
|                      | 4                             | 2.72                               | 2.86                               | 105                  |
|                      | 8                             | 1.36                               | 1.21                               | 89                   |

**Table S8.** Assay linearity: C-peptide sensor

| <b>Sample number</b> | <b>Sample dilution (fold)</b> | <b>Expected concentration (nM)</b> | <b>Observed concentration (nM)</b> | <b>% of recovery</b> |
|----------------------|-------------------------------|------------------------------------|------------------------------------|----------------------|
| 1                    | 0                             | 2.72                               | 2.72                               | 100                  |
|                      | 2                             | 1.36                               | 1.24                               | 91                   |
|                      | 4                             | 0.68                               | 0.64                               | 94                   |
|                      | 8                             | 0.34                               | 0.39                               | 115                  |
| 2                    | 0                             | 5.68                               | 5.68                               | 100                  |
|                      | 2                             | 2.84                               | 2.71                               | 95                   |
|                      | 4                             | 1.42                               | 1.28                               | 90                   |
|                      | 8                             | 0.71                               | 0.65                               | 92                   |
| 3                    | 0                             | 10.40                              | 10.40                              | 100                  |
|                      | 2                             | 5.20                               | 5.51                               | 106                  |
|                      | 4                             | 2.60                               | 2.49                               | 96                   |
|                      | 8                             | 1.30                               | 1.12                               | 86                   |

**Table S9.** Assay crossreactivity: insulin sensor

| Analyte               | Concentration (nM) | Sensor response (100%) |
|-----------------------|--------------------|------------------------|
| Human insulin         | 10                 | 100.0 +/- 7.2          |
| Bovine insulin        | 10                 | 187.6 +/- 4.2          |
|                       | 100                | 93.8 +/- 6.7           |
|                       | 1000               | 22.9 +/- 12.1          |
| Porcine insulin       | 10                 | 225.1 +/- 4.5          |
|                       | 100                | 134.5 +/- 32.3         |
|                       | 1000               | 29.2 +/- 0.6           |
| Human pro-insulin     | 10                 | 16.9 +/- 3.5           |
|                       | 100                | 55.4 +/- 0.4           |
|                       | 1000               | 81.9 +/- 0.7           |
| Insulin growth factor | 10                 | 0.1 +/- 0.1            |
|                       | 100                | 0.6 +/- 0.7            |
|                       | 1000               | 1.0 +/- 0.2            |
| Glucagon              | 10                 | 0.5 +/- 0.1            |
|                       | 100                | 1.0 +/- 0.4            |
|                       | 1000               | 2.6 +/- 0.8            |
| Human C-peptide       | 10                 | n.d.*                  |
|                       | 100                | n.d.                   |
|                       | 1000               | n.d.                   |
| Canine C-peptide      | 10                 | n.d.                   |
|                       | 100                | n.d.                   |
|                       | 1000               | n.d.                   |
| Porcine C-peptide     | 10                 | n.d.                   |
|                       | 100                | n.d.                   |
|                       | 1000               | n.d.                   |
| Angiotensin I         | 10                 | n.d.                   |
|                       | 100                | n.d.                   |
|                       | 1000               | n.d.                   |
| Angiotensin II        | 10                 | n.d.                   |
|                       | 100                | n.d.                   |
|                       | 1000               | n.d.                   |
| ACTH                  | 10                 | n.d.                   |
|                       | 100                | n.d.                   |
|                       | 1000               | n.d.                   |

\* Result was reported as not detectable (n.d.) when the measured signal was zero or was higher than zero but smaller than the standard deviation of the measurement.

**Table S10.** Assay crossreactivity: C-peptide sensor

| Analyte               | Concentration (nM) | Sensor response (100%) |
|-----------------------|--------------------|------------------------|
| Human C-peptide       | 10                 | 100.0 +/- 4.5          |
| Bovine insulin        | 10                 | n.d.*                  |
|                       | 100                | 2.0 +/- 0.4            |
|                       | 1000               | n.d.                   |
| Porcine insulin       | 10                 | n.d.                   |
|                       | 100                | 2.1 +/- 0.4            |
|                       | 1000               | 3.1 +/- 1.1            |
| Human pro-insulin     | 10                 | 9.0 +/- 1.7            |
|                       | 100                | 66.8 +/- 4.1           |
|                       | 1000               | 284.8 +/- 17.5         |
| Insulin growth factor | 10                 | n.d.                   |
|                       | 100                | 3.1 +/- 0.3            |
|                       | 1000               | 4.1 +/- 0.5            |
| Glucagon              | 10                 | n.d.                   |
|                       | 100                | 1.4 +/- 0.4            |
|                       | 1000               | 2.0 +/- 1.2            |
| Human insulin         | 10                 | n.d.                   |
|                       | 100                | n.d.                   |
|                       | 1000               | n.d.                   |
| Canine C-peptide      | 10                 | n.d.                   |
|                       | 100                | 1.4 +/- 0.3            |
|                       | 1000               | 15.0 +/- 0.1           |
| Porcine C-peptide     | 10                 | n.d.                   |
|                       | 100                | 1.3 +/- 0.4            |
|                       | 1000               | 1.7 +/- 0.4            |
| Angiotensin I         | 10                 | n.d.                   |
|                       | 100                | n.d.                   |
|                       | 1000               | 1.3 +/- 0.4            |
| Angiotensin II        | 10                 | n.d.                   |
|                       | 100                | n.d.                   |
|                       | 1000               | 0.8 +/- 0.4            |
| ACTH                  | 10                 | n.d.                   |
|                       | 100                | n.d.                   |
|                       | 1000               | 1.2 +/- 0.8            |

\* Result was reported as not detectable (n.d.) when the measured signal was zero or was higher than zero but smaller than the standard deviation of the measurement.
